# Supplementary material for: SynthSeg: Segmentation of brain MRI scans of any contrast and resolution without retraining
Source: PubMed Central journal article supplement (PMC10154424; doi:10.1016/j.media.2023.102789), 2023-02-25
Supplement: NIHMS1891066-supplement-appendix_A.pdf [file NIHMS1891066-supplement-appendix_A.pdf]

# SynthSeg: Segmentation of brain MRI scans of any contrast and resolution without retraining

## Supplementary materials

Benjamin Billot, Douglas N. Greve, Oula Puonti, Axel Thielscher, Koen Van Leemput, Bruce Fischl, Adrian V. Dalca, and Juan Eugenio Iglesias

### Supplement 1: Examples of generated synthetic scans

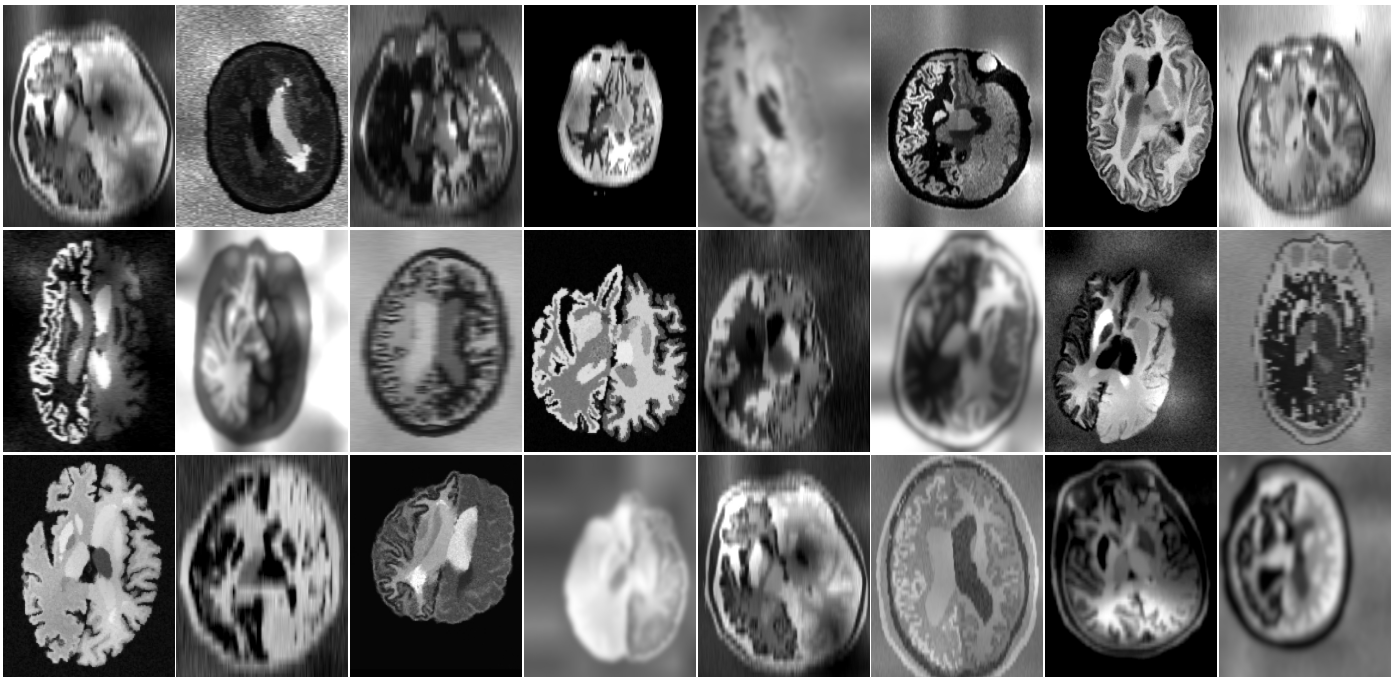

Fig. S1. Representative samples from the presented generated model. Synthetic scans present a considerable diversity in terms of contrasts and resolutions, but also in terms of sizes, shapes, bias fields, skull stripping, lesions, and anatomical morphology.

**Supplement 2: Values of the generative model hyperparameters****Table S1.** Values of the hyperparameters controlling the generative model. Intensity parameters assume an input in the [0, 255] interval. Rotations are expressed in degrees, and spatial measures are in millimeters.

| Hyperparameter | $a_{rot}$ | $b_{rot}$ | $a_{sc}$ | $b_{sc}$ | $a_{sh}$ | $b_{sh}$ | $a_{tr}$ | $b_{tr}$ | $b_{nonlin}$ | $a_{\mu}$ | $b_{\mu}$ | $a_{\sigma}$ | $b_{\sigma}$ | $b_B$ | $\sigma_y^2$ | $r_{HR}$ | $b_{res}$ | $a_{\alpha}$ | $b_{\alpha}$ |
|----------------|-----------|-----------|----------|----------|----------|----------|----------|----------|--------------|-----------|-----------|--------------|--------------|-------|--------------|----------|-----------|--------------|--------------|
| Value          | -20       | 20        | 0.8      | 1.2      | -0.015   | 0.015    | -30      | 30       | 4            | 0         | 255       | 0            | 35           | 0.6   | 0.4          | 1        | 9         | 0.95         | 1.05         |

**Supplement 3: List of label values used during training****Table S2.** List of the labels used for image synthesis, prediction, and evaluation. Note that during generation, we randomly model skull stripping with 50% probability, by removing all extra-cerebral labels from the training segmentation. In addition, we also model *imperfect* skull stripping, with a further 50% chances (so 25% of the total cases), by removing all the extra-cerebral labels except the cerebro-spinal fluid (which surrounds the brain). Different contralateral labels are used for structures marked with <sup>R/L</sup>.

| Label                                     | removed for skull stripping simulation | predicted | evaluated |
|-------------------------------------------|----------------------------------------|-----------|-----------|
| Background                                | N/A                                    | yes       | no        |
| Cerebral white matter <sup>R/L</sup>      | no                                     | yes       | yes       |
| Cerebral cortex <sup>R/L</sup>            | no                                     | yes       | yes       |
| Lateral ventricle <sup>R/L</sup>          | no                                     | yes       | yes       |
| Inferior Lateral Ventricle <sup>R/L</sup> | no                                     | yes       | no        |
| Cerebellar white matter <sup>R/L</sup>    | no                                     | yes       | yes       |
| Cerebellar grey matter <sup>R/L</sup>     | no                                     | yes       | yes       |
| Thalamus <sup>R/L</sup>                   | no                                     | yes       | yes       |
| Caudate <sup>R/L</sup>                    | no                                     | yes       | yes       |
| Putamen <sup>R/L</sup>                    | no                                     | yes       | yes       |
| Pallidum <sup>R/L</sup>                   | no                                     | yes       | yes       |
| Third ventricle                           | no                                     | yes       | yes       |
| Fourth ventricle                          | no                                     | yes       | yes       |
| Brainstem                                 | no                                     | yes       | yes       |
| Hippocampus <sup>R/L</sup>                | no                                     | yes       | yes       |
| Amygdala <sup>R/L</sup>                   | no                                     | yes       | yes       |
| Accumbens area <sup>R/L</sup>             | no                                     | yes       | no        |
| Ventral DC <sup>R/L</sup>                 | no                                     | yes       | no        |
| Cerebral vessels <sup>R/L</sup>           | no                                     | no        | no        |
| Choroid plexus <sup>R/L</sup>             | no                                     | no        | no        |
| White matter lesions <sup>R/L</sup>       | no                                     | no        | no        |
| Cerebro-spinal Fluid (CSF)                | yes/no                                 | no        | no        |
| Artery                                    | yes                                    | no        | no        |
| Vein                                      | yes                                    | no        | no        |
| Eyes                                      | yes                                    | no        | no        |
| Optic nerve                               | yes                                    | no        | no        |
| Optic chiasm                              | yes                                    | no        | no        |
| Soft tissues                              | yes                                    | no        | no        |
| Rectus muscles                            | yes                                    | no        | no        |
| Mucosa                                    | yes                                    | no        | no        |
| Skin                                      | yes                                    | no        | no        |
| Cortical bone                             | yes                                    | no        | no        |
| Cancellous bone                           | yes                                    | no        | no        |

**Supplement 4: Versions of the training label maps**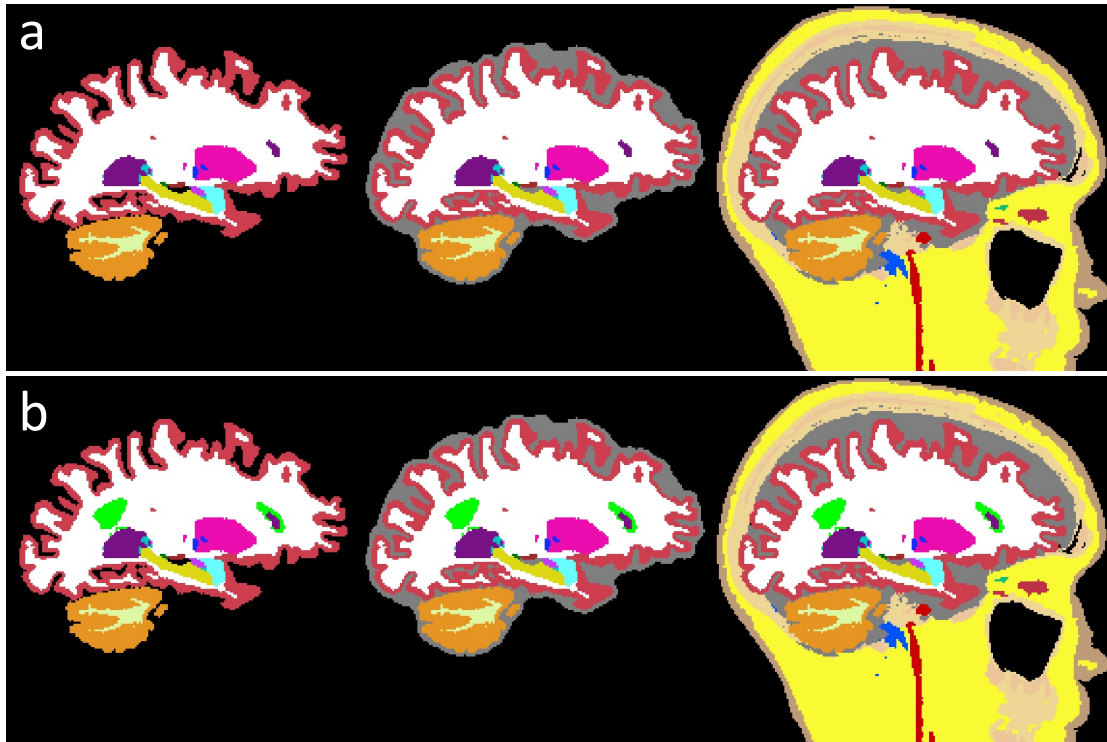

Fig. S2. Example of all versions of the label maps used during training. Each map is available (a) with, or (b) without lesion labels (bright green), and at different levels of skull stripping: perfect (left), imperfect (middle), or no skull stripping (right). Using these different versions of training label maps enables us to build robustness to white matter lesions and to (possibly imperfect) skull stripping. The lesion labels are obtained with FreeSurfer (Fischl, 2012) and directly “pasted” on the existing label maps. Training lesion labels are mainly located in the cerebral white matter, but occurrences are also found in the cerebellum, thalamus, pallidum, and putamen. Regarding the extra-cerebral labels, these are obtained with a Bayesian segmentation approach (Puonti *et al.*, 2020).

**Supplement 5: Modifications to the nnUNet, and TTA, and SIFA methods**

All competing methods tested in this article are used with their default implementation, except for few minor differences that we list here. All the following modifications improve the scores obtained by the original implementations on the validation set.

**nnUNet (Isensee *et al.*, 2021)<sup>6</sup>:** We now apply random flipping along the right/left axis (Dice score improvement of 0.09 on the validation set), as opposed to the original implementation where flipping was applied in any direction. This also mimics the augmentation strategy used for SynthSeg (see Section 4.2).

**TTA (Karani *et al.*, 2021)<sup>7</sup>:** First, the image normaliser now uses five instead of three convolutional layers, which increases its learning capacity, especially in the case of large domain gaps (Dice improvement of 0.16 on the validation set). The second modification is relative to the training atlas that is used in Karani *et al.* (2021) as ground-truth during the first steps of the adaptation. Here, we add an offline step, where we rigidly register this atlas to the test scan with NiftyReg (Modat *et al.*, 2010) We emphasise that this step was not done in the original implementation, since test scans in Karani *et al.* were already pre-aligned. Moreover, we also increase the number of steps during which the atlas is used by increasing the beta threshold from 0.25 to 0.4 (Karani *et al.*, 2021) (Dice improvement of 0.06 on the validation set). Finally, we replace the existing data augmentation scheme by the same spatial, intensity and bias augmentations as for SynthSeg (Dice improvement of 0.03 on the validation set).

**SIFA (Chen *et al.*, 2019)<sup>8</sup>:** For this method, we added an online data augmentation step during training, where we apply the same spatial, intensity and bias augmentations as for SynthSeg (Dice improvement of 0.18 on the validation set).

<sup>6</sup><https://github.com/MIC-DKFZ/nnUNet>

<sup>7</sup><https://github.com/neerakara/test-time-adaptable-neural-networks-for-domain-generalization>

<sup>8</sup><https://github.com/cchen-cc/SIFA>

### Supplement 6: Number of retraining for each value of $N$

Table S3. Number of label maps and associated retrainsings used to assess performance against the amount of training subjects. Scores are then averaged across the retrainsings. We emphasise that the number of retrainsings is higher for low values of  $N$  to compensate for the greater variability in random subject selection. All training label maps are randomly taken from the manual segmentations of T1-39.

| Number of training segmentations | 1 | 5 | 10 | 15 | 20 |
|----------------------------------|---|---|----|----|----|
| Number of retrainsings           | 8 | 5 | 4  | 3  | 2  |

### Supplement 7: Training label maps for cardiac segmentation

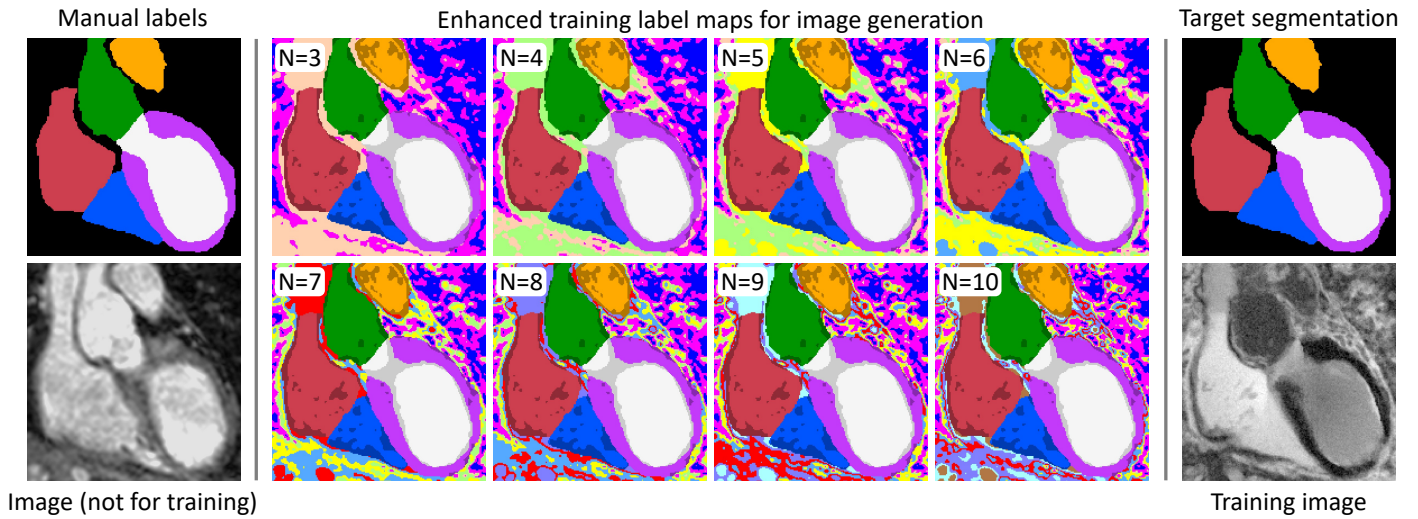

Fig. S3. Training label maps for extension to cardiac segmentation are obtained by combining three types of labels. We first start with manual delineations (top left). Second, we obtain labels for sub-regions (represented in the middle label maps by slightly shaded colours) of each of these foreground regions by clustering the associated intensities in the corresponding image (bottom left). Third, we obtain automated labels for the background structures (i.e., vessels, bronchi, bones, etc., for which no manual segmentations are available), by clustering the corresponding intensities into  $N$  classes ( $N \in [3, 10]$ ), in order to model them with different levels of granularity. During training, one of these enhanced label maps is randomly selected to synthesise a training image (bottom right) by using the proposed generative model. Note that the target segmentation is reset to the initial manual labels.

### Supplement 8: Values of the generative model hyperparameters used in the heart experiments

Table S4. Values of the hyperparameters controlling the generative model used in the heart experiments. As before, intensity parameters assume an input in the  $[0, 255]$  interval. Rotations are expressed in degrees, and spatial measures are in millimeters.

| Hyperparameter | $a_{rot}$ | $b_{rot}$ | $a_{sc}$ | $b_{sc}$ | $a_{sh}$ | $b_{sh}$ | $a_{tr}$ | $b_{tr}$ | $b_{nonlin}$ | $a_{\mu}$ | $b_{\mu}$ | $a_{\sigma}$ | $b_{\sigma}$ | $b_B$ | $\sigma_y^2$ | $r_{HR}$ | $b_{res}$ | $a_{\alpha}$ | $b_{\alpha}$ |
|----------------|-----------|-----------|----------|----------|----------|----------|----------|----------|--------------|-----------|-----------|--------------|--------------|-------|--------------|----------|-----------|--------------|--------------|
| Value          | -45       | 45        | 0.8      | 1.2      | -0.02    | 0.02     | -40      | 40       | 8            | 0         | 255       | 0            | 35           | 0.7   | 0.5          | 1        | 10        | 0.95         | 1.05         |
